# Supplementary material for: Inhibition of HL-60 cell growth via cell cycle arrest and apoptosis induction by a cycloartane–labdane heterodimer from Pseudolarix amabilis
Source: Royal Society of Chemistry journal article supplement (doi:10.1039/c5ob02661j), 2016-01-01

## Supporting Information

### **Inhibition of HL-60 cells growth via cell cycle arrest and apoptosis induction by a cycloartane-labdane heterodimer from *Pseudolarix amabilis***

Xinhui Tian,<sup>a,⊥</sup> Niao Yang,<sup>a,⊥</sup> Bo Li,<sup>b,⊥</sup> Jianping Zhang,<sup>a</sup> Xike Xu,<sup>a</sup> Rongcai Yue,<sup>a</sup>

Huiliang Li,<sup>a</sup> Liping Chen,<sup>a</sup> Yunheng Shen<sup>a,\*</sup> and Weidong Zhang<sup>a,b,\*</sup>

<sup>a</sup> *School of Pharmacy, Second Military Medical University, Shanghai 200433, P. R. China*

<sup>b</sup> *Innovative Research Center of Traditional Chinese Medicine, Shanghai Institute of Pharmaceutical Industry, Shanghai 201204, P. R. China*

⊥ These authors contributed equally to this work.

\* To whom correspondence should be addressed.

Tel: +86-21-81871244; +86-21-81871245

Email: wdzhangy@hotmail.com, shenyunheng@hotmail.com

## Contents

**Figure S1** HRESIMS spectrum of pseudolaridimer C (**1**)

**Figure S2** 400 MHz  $^1\text{H}$  NMR spectrum of pseudolaridimer C (**1**) in pyridine- $d_5$

**Figure S3** 100 MHz  $^{13}\text{C}$  NMR spectrum of pseudolaridimer C (**1**) in pyridine- $d_5$

**Figure S4** 100 MHz DEPT NMR spectrum of pseudolaridimer C (**1**) in pyridine- $d_5$

**Figure S5** 400 MHz HSQC NMR spectrum of pseudolaridimer C (**1**) in pyridine- $d_5$

**Figure S6** 400 MHz  $^1\text{H}$ - $^1\text{H}$  COSY NMR spectrum of pseudolaridimer C (**1**) in pyridine- $d_5$

**Figure S7** 400 MHz HMBC NMR spectrum of pseudolaridimer C (**1**) in pyridine- $d_5$

**Figure S8** 400 MHz ROESY NMR spectrum of pseudolaridimer C (**1**) in pyridine- $d_5$

Figure S1 HRESIMS spectrum of pseudolaridimer C (1)

**Elemental Composition Report**

**Single Mass Analysis**

Tolerance = 10.0 PPM / DBE: min = -1.5, max = 50.0

Element prediction: Off

Number of isotope peaks used for i-FIT = 3

Monoisotopic Mass, Even Electron Ions

10 formula(e) evaluated with 1 results within limits (up to 50 best isotopic matches for each mass)

Elements Used:

C: 40-60 H: 70-80 O: 1-10 Na: 1-1

SIPI

PK-LB-10 M.W=758

Q12-1447H1 40 (1.408) AM (Cen,2, 80.00, Ar,5000.0,801.34,1.00); Sm (SG, 2x3.00); Sb (1,40.00 ); Sb (1,40.00 ); Sb (1,40.00 ); Cm (26:45)

Q-Tof micro  
YA019

14:48:51,01-Sep-2012

7.36e+003

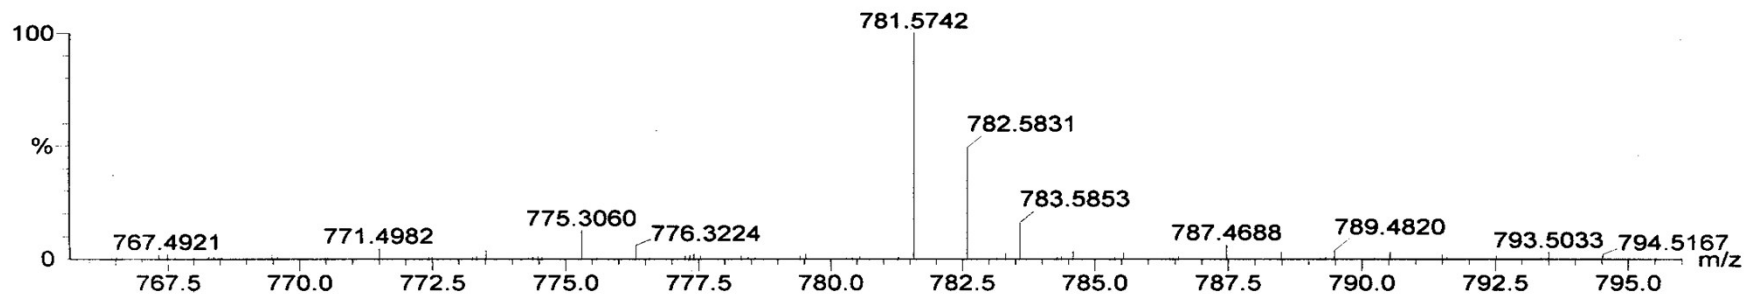

|          |            |      |      |      |       |               |  |
|----------|------------|------|------|------|-------|---------------|--|
| Minimum: |            |      |      | -1.5 |       |               |  |
| Maximum: |            | 5.0  | 10.0 | 50.0 |       |               |  |
| Mass     | Calc. Mass | mDa  | PPM  | DBE  | i-FIT | Formula       |  |
| 781.5742 | 781.5747   | -0.5 | -0.6 | 11.5 | 29.2  | C50 H78 O5 Na |  |

**Figure S2** 400 MHz  $^1\text{H}$  NMR spectrum of pseudolaridimer C (**1**) in pyridine- $d_5$

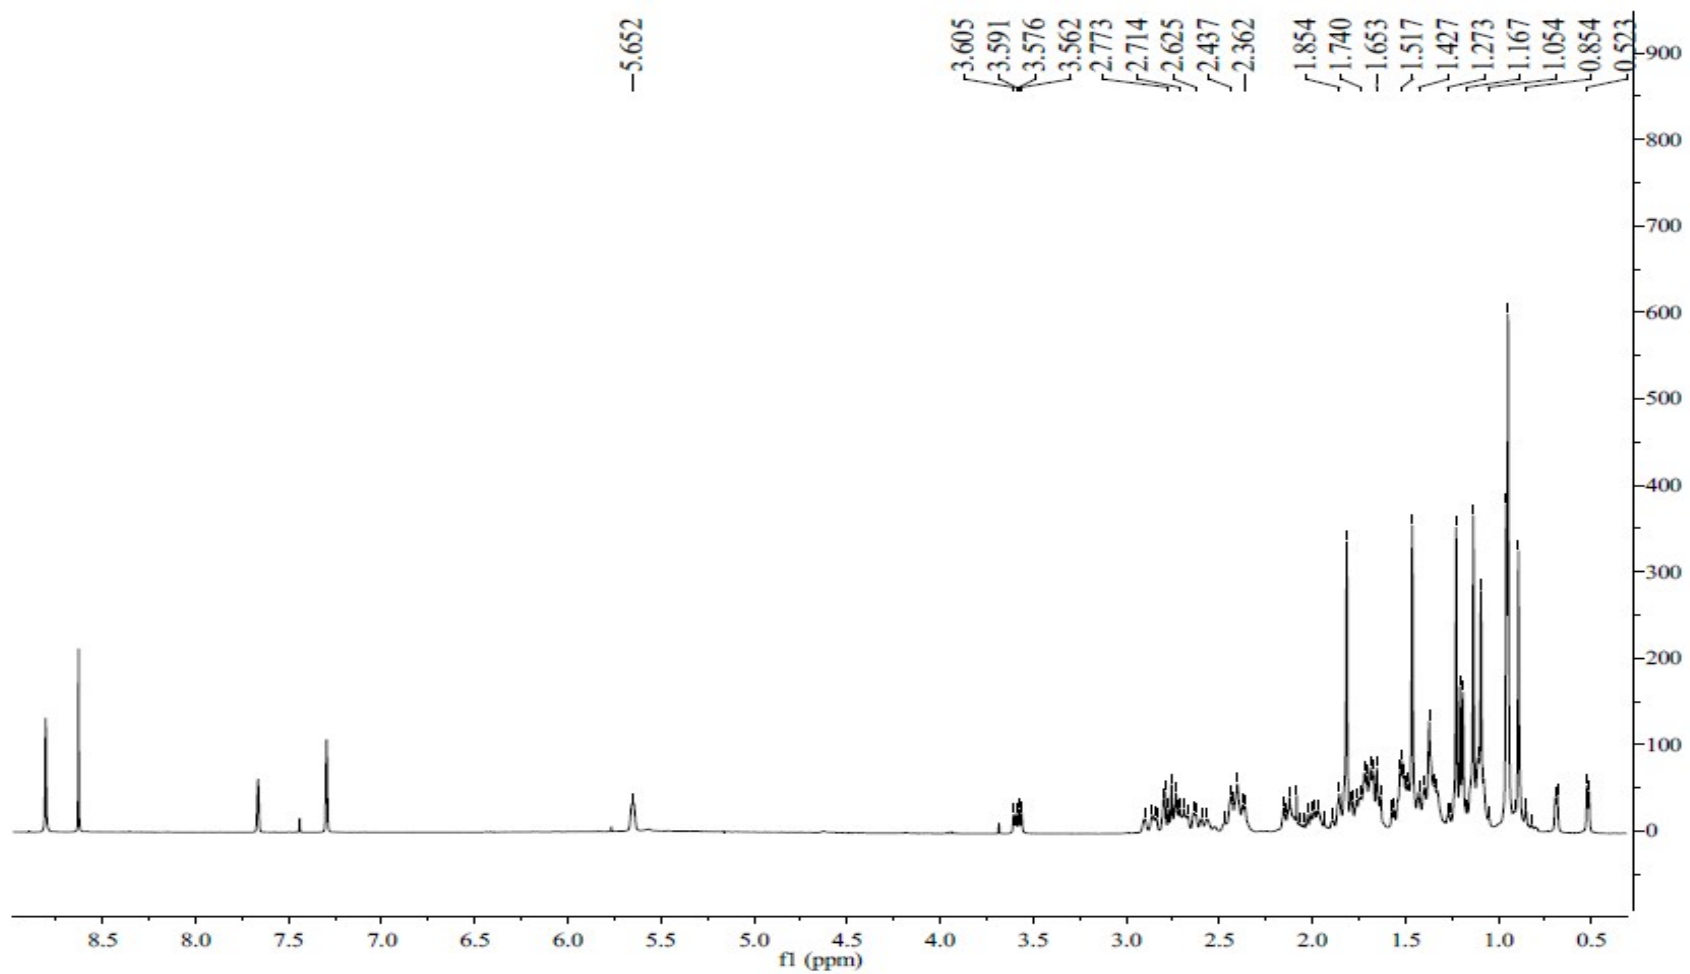

**Figure S3** 100 MHz  $^{13}\text{C}$  NMR spectrum of pseudolaridimer C (**1**) in pyridine- $d_5$

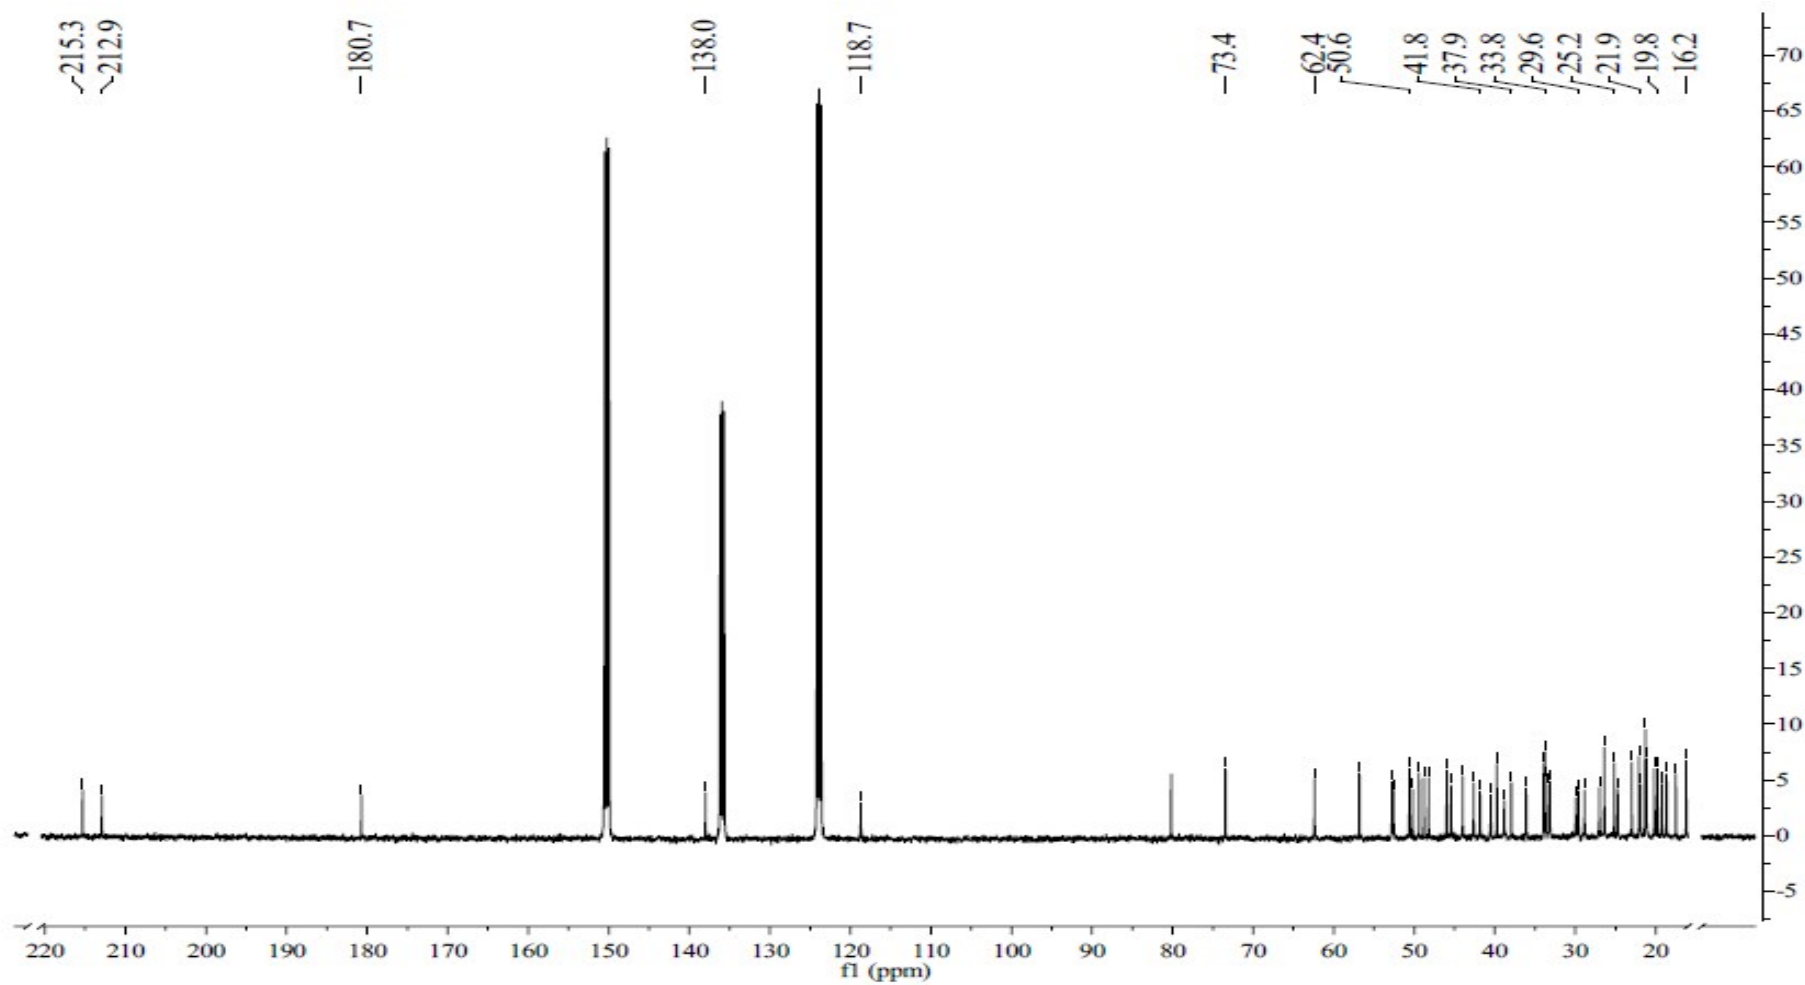

**Figure S4** 100 MHz DEPT NMR spectrum of pseudolaridimer C (**1**) in pyridine-*d*<sub>5</sub>

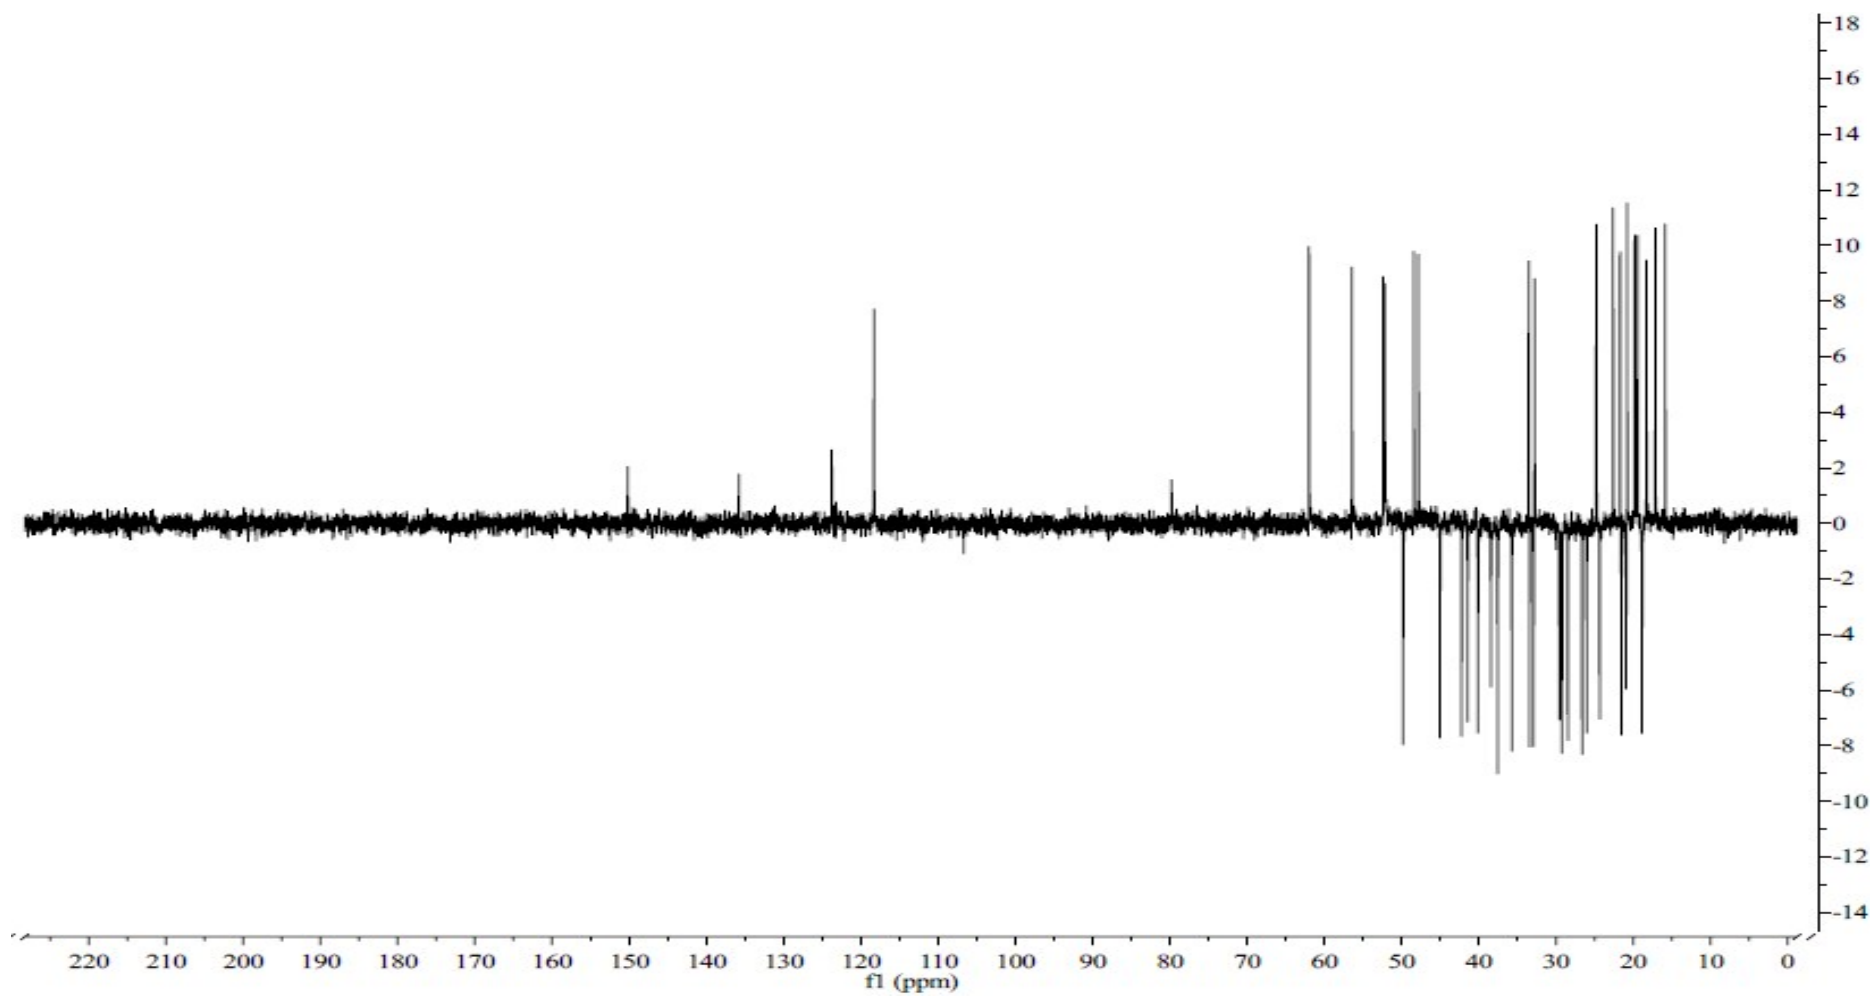

Figure S5 400 MHz HSQC NMR spectrum of pseudolaridimer C (1) in pyridine- $d_5$

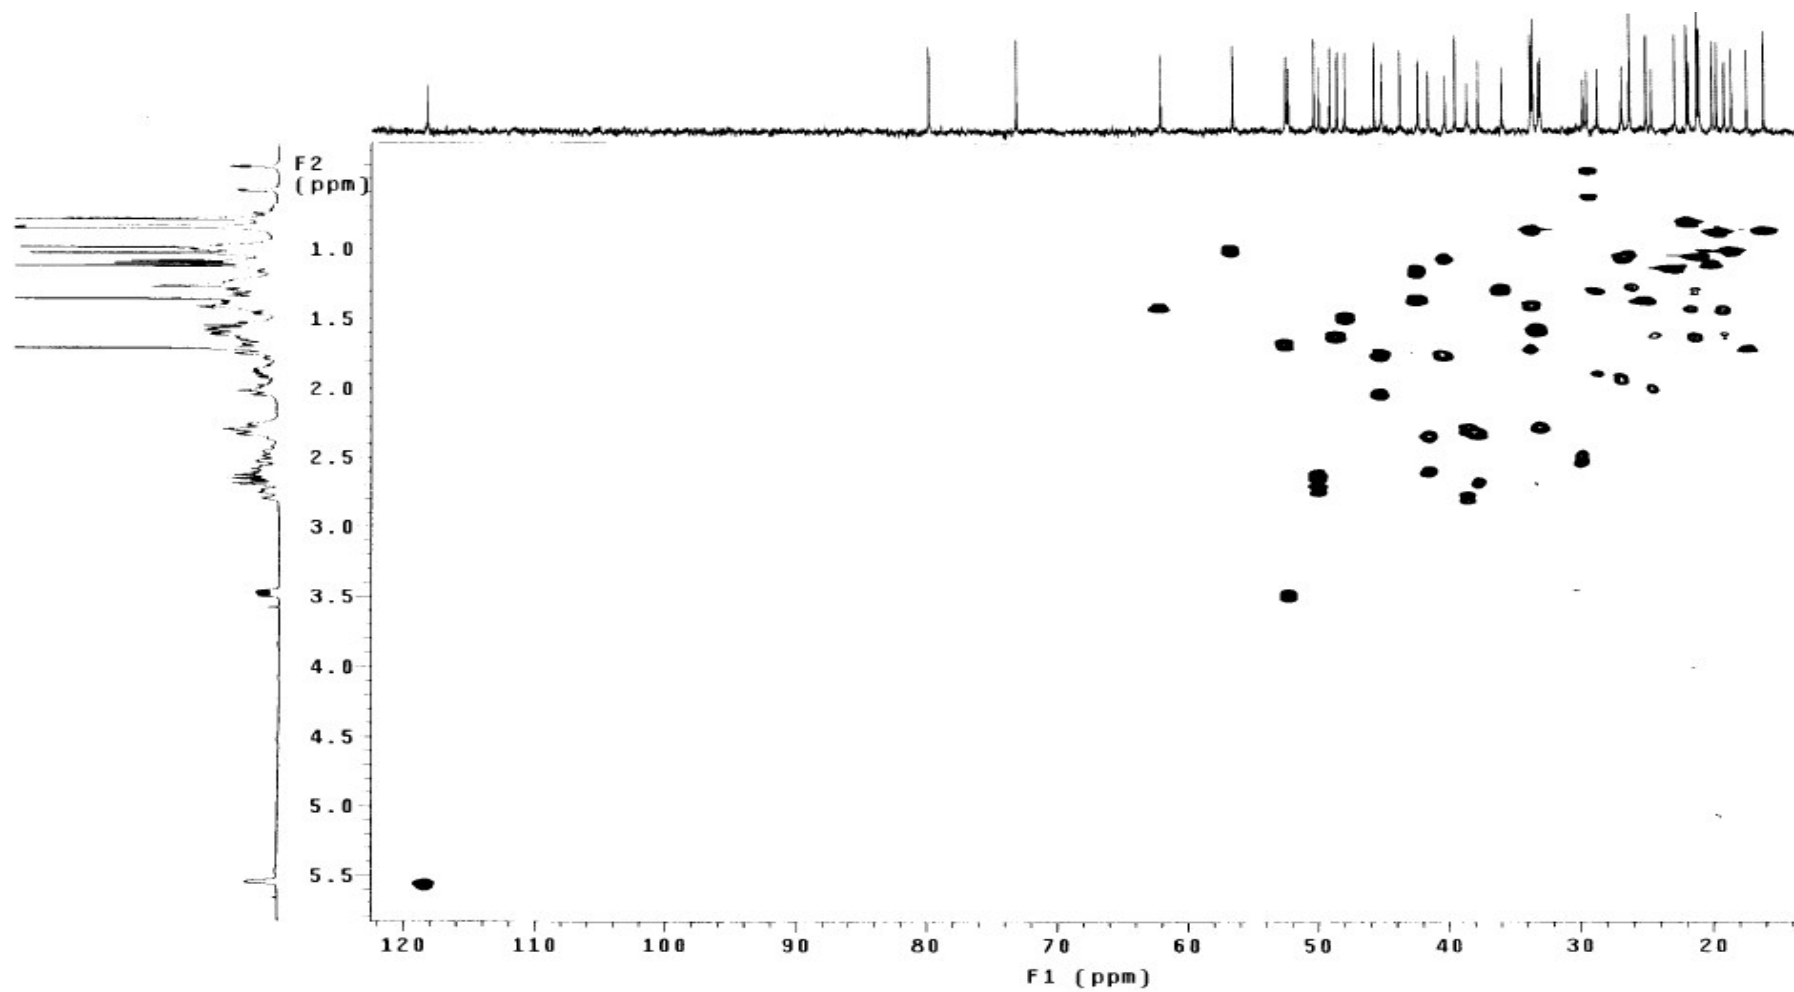

Figure S6 400 MHz  $^1\text{H}$ - $^1\text{H}$  COSY NMR spectrum of pseudolaridimer C (1) in pyridine- $d_5$

Solvent: pyridine  
Ambient temperature  
Mercury-400BB "siem401"  
  
Relax. delay 1.000 sec  
COSY 90-90  
Acq. time 0.160 sec  
Width 6410.3 Hz  
ZD Width 5410.3 Hz  
4 repetitions  
300 increments  
OBSERVE H1, 400.1645888 MHz  
DATA PROCESSING  
Sq. sine bell 0.080 sec  
F1 DATA PROCESSING  
Sq. sine bell 0.024 sec  
FT size 2048 x 2048  
Total time 26 min, 9 sec

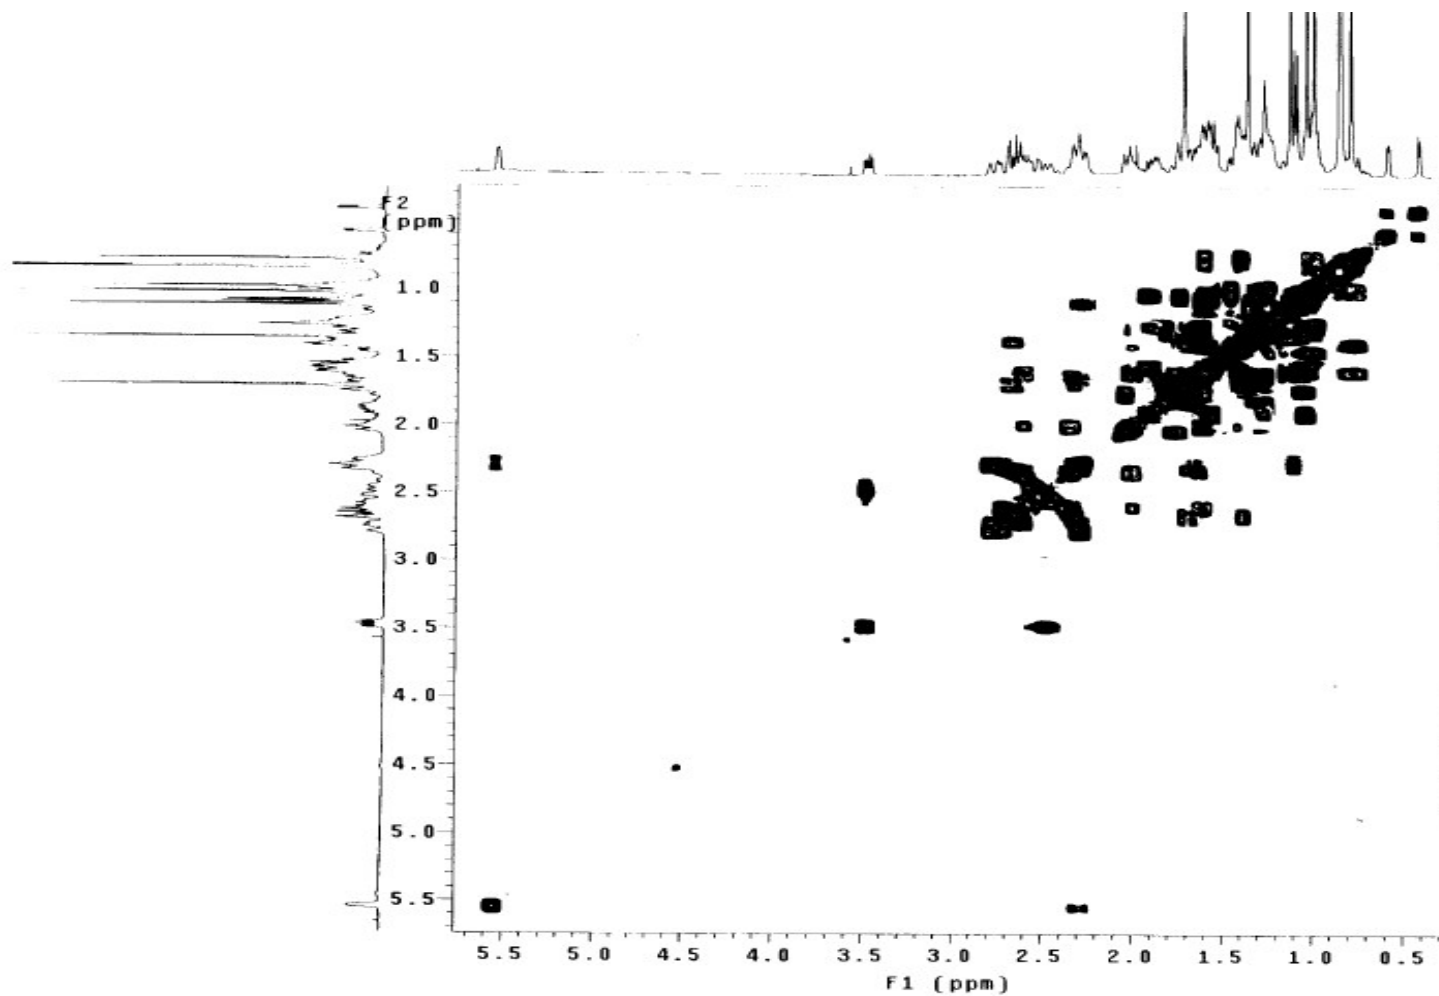



Figure S7 400 MHz HMBC NMR spectrum of pseudolaridimer C (1) in pyridine-*d*<sub>5</sub>

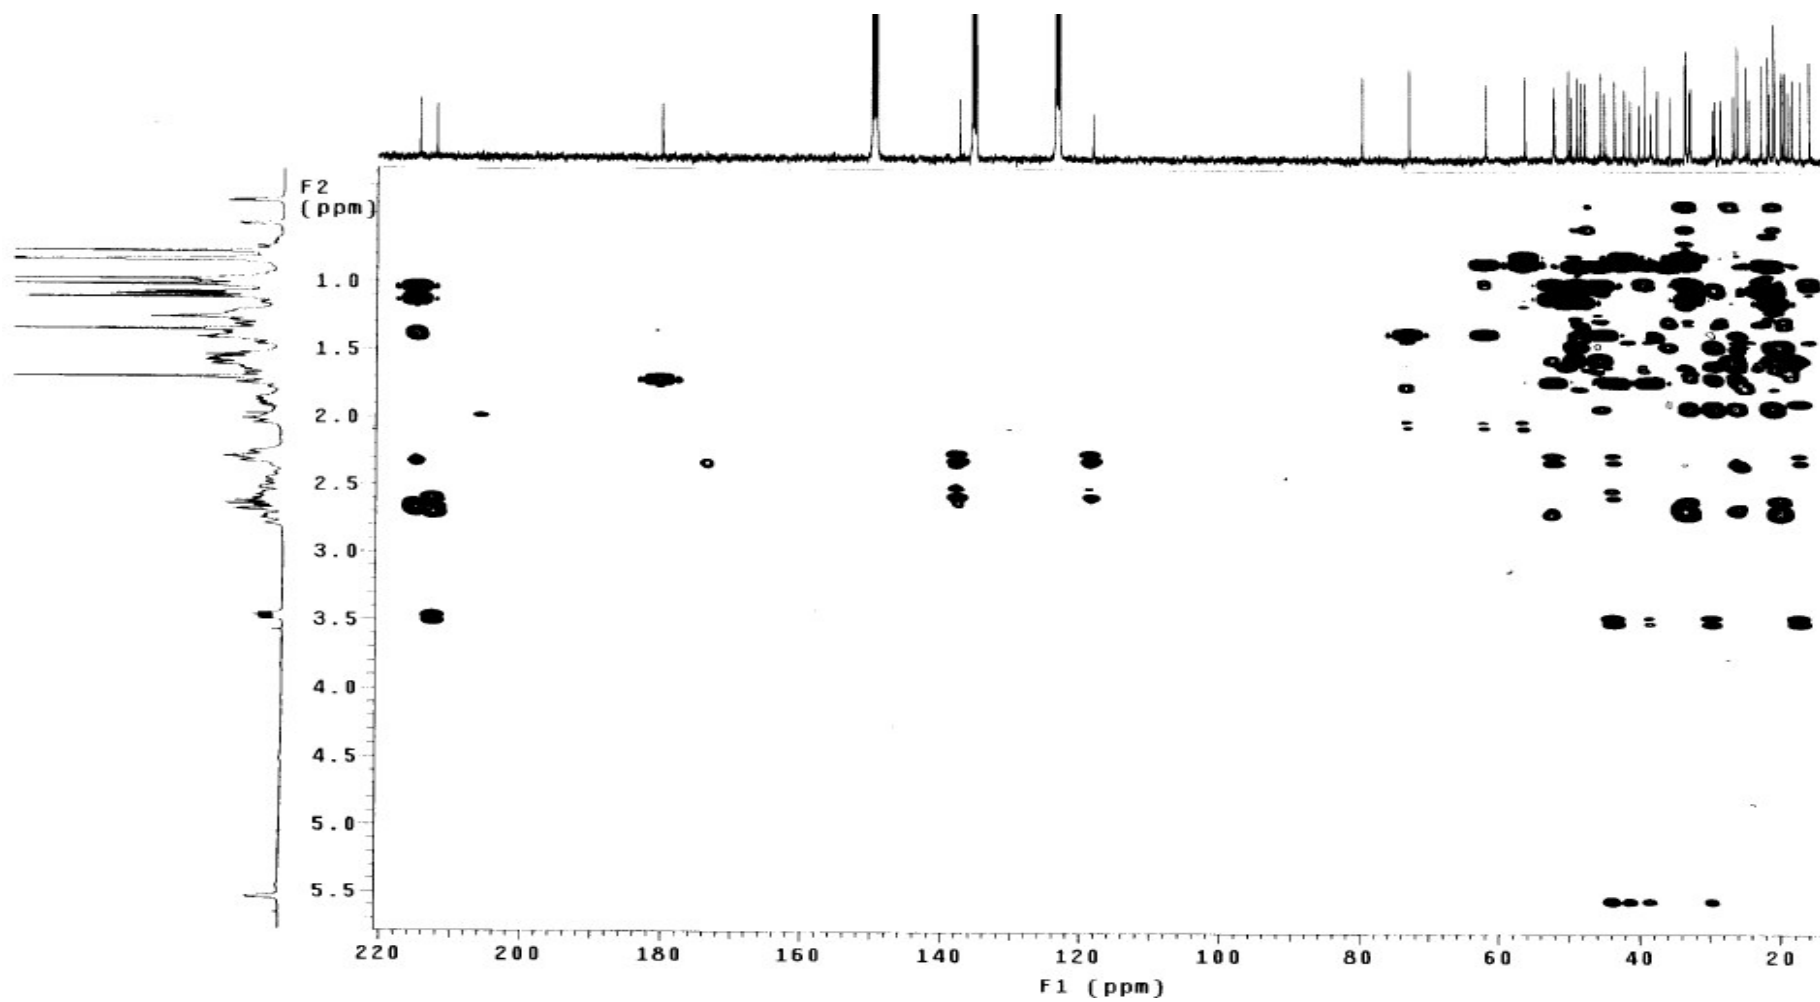

Figure S8 400 MHz ROESY NMR spectrum of pseudolaridimer C (1) pyridine-*d*<sub>5</sub>

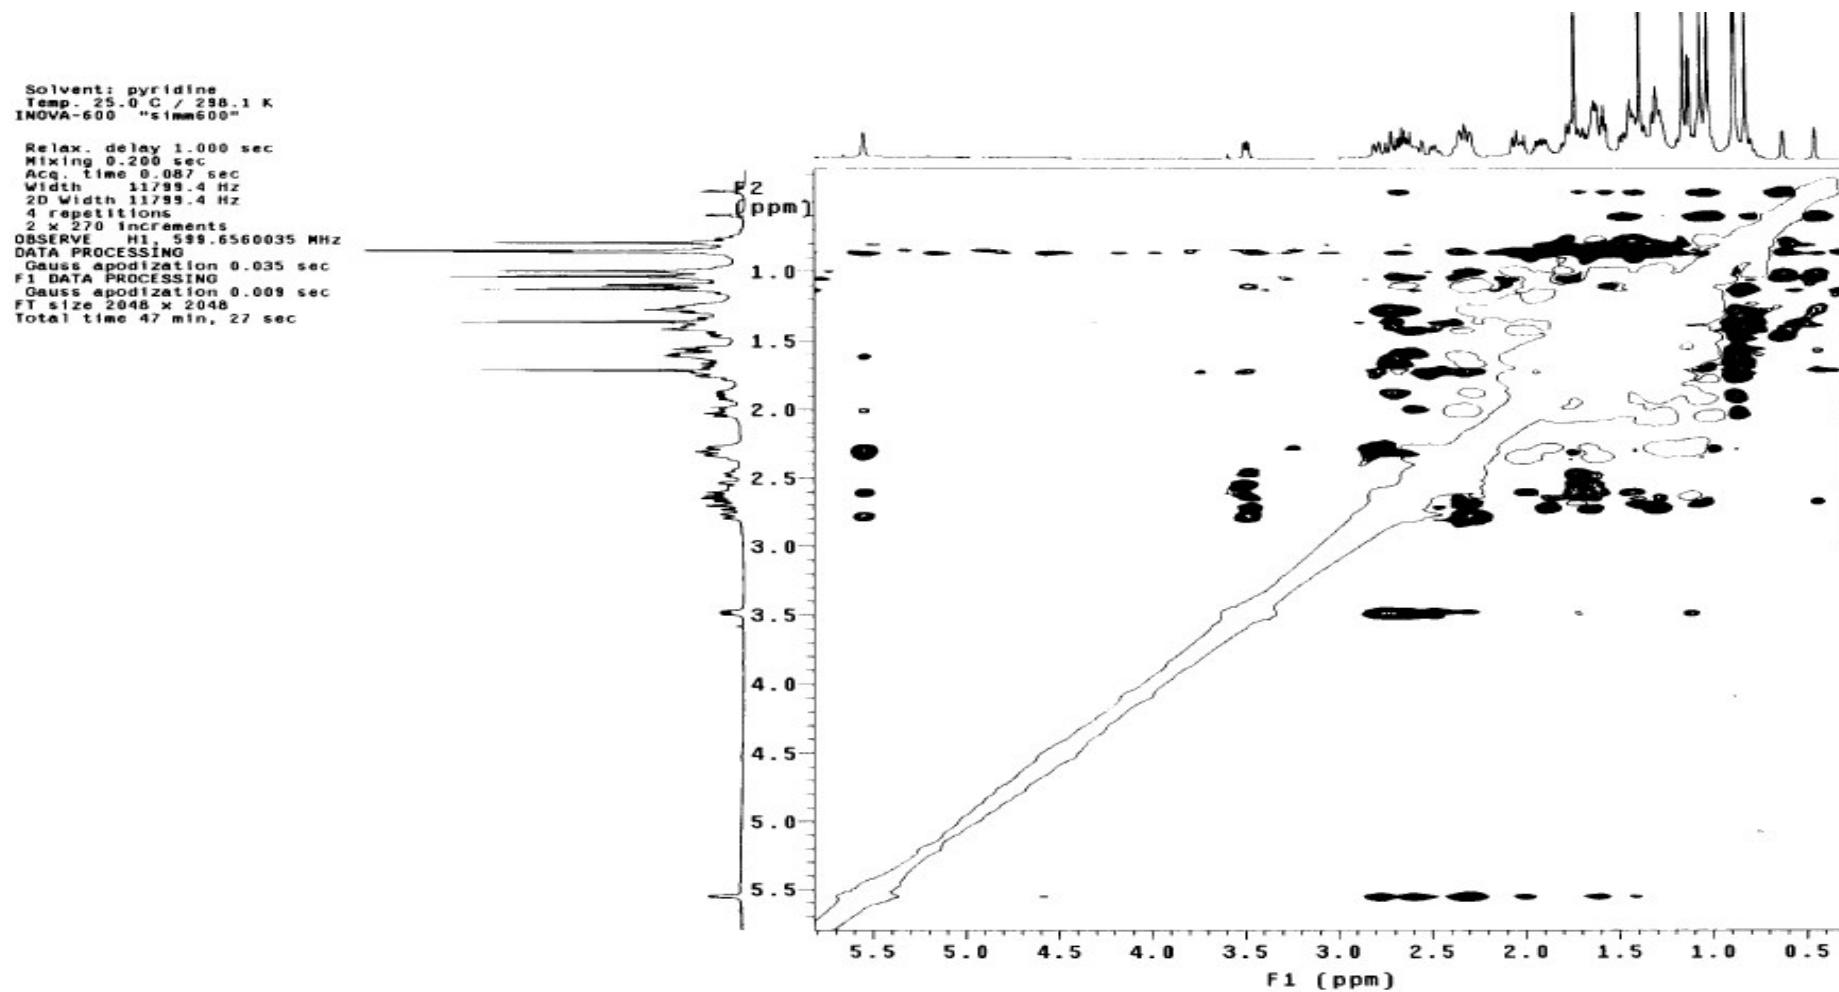

Supplement: c5ob02661j1.pdf [file c5ob02661j1.pdf]
